# Supplementary material
Source: PubMed Central journal article supplement (PMC4332780)
Supplement: NIHMS662583-supplement-1.pdf [file NIHMS662583-supplement-1.pdf]

# Supplemental materials

## Ethics Statement

Mouse studies were carried out in strict accordance with the recommendations in the Guide for the Care and Use of Laboratory Animals of the National Institutes of Health. All animal studies were performed with the prior approval of the Animal Care and Use Committee of Johns Hopkins University (protocol MO08M19).

Rabbit studies were performed according to the quality service and ethical treatment policy of Covance Inc. All Covance programs are AAALAC International accredited, and meet or exceed USDA Research License requirements, as well as those of the "Guide for Care and Use of Laboratory Animals". All animal studies are performed with the prior approval of the Institutional Animal Care and Use Committee.

## Conventional in-vitro neutralization method

293TT cells were seeded at  $1.5 \times 10^4$  per well in a flat bottom 96-well cell culture plate with neutralization medium (DMEM without phenol red, 10% FBS, 1% non-essential amino acids, 1% GlutaMax, 10mM HEPES) and incubated at 37°C culture 5% CO<sub>2</sub> incubator overnight. Antisera were serially diluted with the neutralization medium in a 96-well plate, and 50 µL of diluted serum was mixed with 50 µL of PsV working solution in a round bottom 96-well plate and incubated at 37°C for 2 hr. The entire volume was transferred to corresponding well of the plate which was seeded with 293TT cells a day before. Plate was returned to the incubator for 67 hr, and the culture supernatant was analyzed for the presence of SEAP Chemiluminescence kit (Clontech laboratories, CA). The in-vitro neutralization titer was defined as the reciprocal of the highest dilution of serum that reduces the SEAP activity by half[1].

## 25 **Cloning of recombinant Fla-L2 fusions**

26 HPV L2 sequences derived from HPV6B, 16, 18, 31, 39, 51, 56, and 73 were codon  
27 optimized for *E. coli* expression by construction using synthetic DNA oligonucleotides (Blue  
28 Heron Biotechnology, Bothell WA). Flagellin B gene (Gene Bank accession# NP\_461698) was  
29 amplified by PCR from genomic DNA purified from *Salmonella typhimurium* LT2 (ATCC,  
30 Manassas, VA). The Fla only construct was generated by replacement of flagellin B domain D3  
31 region (aa188-296) with a multicloning site linker GGSGGSPRGTGSEFGSGGS. Fla~1x11-200  
32 was constructed by replacement of domain D3 with HPV16 L2 aa 11-200 via recombinant PCR.  
33 A synthetic concatamer containing the coding sequence for L2 aa11-88 from multiple HPV types  
34 was fused to the C-terminus of Fla-62, resulting in Fla~5x11-88 (5 HPV types in order as 6B-16-  
35 18-31-39) or Fla~8x11-88 (8 HPV types as 6B-16-18-31-39-51-56-73) as described in Jagu et  
36 al, [2]) excepting that triplet-glycine spacers were inserted at each of the type-to-type junctions.  
37 A histidine tag was added at the C-terminus of Fla~5x11-88 and Fla~8x11-88. All constructs  
38 were cloned into pET24a+ vector between NdeI and XhoI restriction sites and expressed in  
39 BLR(DE3) cells (Novagen, San Diego, CA.). The details of the bacterial expression and  
40 purification are provided in the supplemental materials section.

41

## 42 **Generation of HPV pseudoviruses (PsV)**

43 Pseudoviruses were generated as previously described[3]. Briefly, plasmid double  
44 expression vectors for codon-optimized L1 and L2 genes were transfected with either a  
45 luciferase or alkaline phosphatase (SEAP) reporter gene plasmid into 293TT cells[3]using  
46 lipofectamin 2000 transfection reagent (Life technologies, CA). Three days after transfection,  
47 cell pellets were collected and rinsed with DMEM and Dulbecco's PBS (DPBS; Life  
48 technologies, CA). The pellets were resuspended in a small volume of DPBS-Mg (DPBS  
49 supplemented with 9.5 mM MgCl<sub>2</sub>) and then transferred into siliconized tubes (Bio Plas Inc, CA).

50 Cells were pelleted by low speed centrifugation, and the supernatant was discarded. For PsV  
51 maturation, an equal volume of lysis buffer (DPBS-Mg supplemented with 0.5% of Brij 58 and  
52 0.2% benzonase) was added to the cell pellet, which was allowed to incubate at 37°C for 24 h.  
53 After maturation, lysates were adjusted to 850 mM NaCl and extracted with high salt buffer  
54 (DPBS with 0.8 M NaCl). Lysates were clarified by centrifugation at 10,000 x g for 10 min,  
55 loaded onto an OptiPrep (Sigma, MO) step gradient (27, 33 and 39%) and spun at 40,000 rpm  
56 in a Beckman (CA) SW40 rotor for 16 hr at 16°C. After centrifugation, 0.5 mL fractions were  
57 collected from the top of the gradient. A sample representing each fraction was diluted and  
58 tested on 293TT cultures[3] for reporter gene expression. Fractions with highest reporter gene  
59 expression SEAP Chemiluminescence kit (Clontech laboratories, CA) were pooled and used for  
60 the serum neutralization assay and the *in vivo* challenge experiments

61

## 62 **Expression of target antigens**

63 Frozen glycerol stocks were stabbed and seeded into 125 mL baffled flasks containing  
64 50 mL of Animal free Luria Broth (AFLB, Teknova, CA) supplemented with 30 µg/ml Kanamycin  
65 (Sigma-Aldrich, MO). Seed cultures were grown overnight shaken at 200 rpm in an Innova  
66 (New Brunswick, NJ) incubator at 30°C. Production cultures consisting of 1L AFLB/Kanamycin  
67 (30µg/ml) in 4L Baffled flasks were inoculated from the overnight seed culture to a starting cell  
68 density OD at 600nm of 0.1. The production cultivation conditions were set to 250 rpm at 37°C  
69 with hourly sampling. Upon achieving a cell density of  $OD_{600nm} = 0.8$ , a pre-induction sample  
70 was taken and the culture was induced with 1 mM Isopropyl β-D-1thiogalactopyranoside (IPTG,  
71 Sigma-Aldrich, MO). The temperature was reduced to 28°C at the time of induction; agitation  
72 remained set at 250 rpm. Samples were taken at 1 hour intervals for 4 to 6 hours post-  
73 induction, at which time the culture was harvested by centrifugation in pre-weighed 450 mL  
74 bottles at 8000 rpm for 10 minutes at 4°C in RC4 (Sorval, ThermoScientific, MA) centrifuge and

75 Ultralight 3000 rotor at 7000 rpm. Supernatant was discarded and cell pellets were stored at -  
76 80°C for purification. Biomass yields (g/L wet cell weights were calculated based gross weight  
77 (bottle + wet cell pellet) minus bottle tare weight. The post induction samples were analyzed for  
78 target protein expression via SDS/PAGE gel electrophoresis and Western Blot with anti-penta-  
79 hisitidine antibody (Qiagen, Germany) or monoclonal antibody directed against the RG-1  
80 domain of HPV16 L2 to verify target antigen.

## 81 **Quasivirion production for rabbit challenge studies**

82 The production of quasivirion (QV) production has been performed as described  
83 before[4;5]. Briefly, 293TT producer cells were cotransfected with circular CRPV genomes and  
84 plasmids expressing codon-modified HPV L1 and L2 of the same papillomavirus type, resulting  
85 in HPV L1/L2 particles encapsidating the CRPV genome. On the second day after transfection,  
86 the cells were lysed with Brij-58, incubated to allow particle maturation, and treated with  
87 Benzonase (Sigma, MO) and Plasmid Safe (Epicenter, WI) to destroy unprotected DNA. Cell  
88 lysates were centrifuged on an OptiPrep density gradient (27,33-39.0%) at 40, 000 rpm in SW40  
89 rotor (Beckman, CA). Fractions (300 µL) were collected dropwise from the bottom of the column  
90 and analyzed for the presence of capsid proteins by immunoblotting and/or nondenaturing  
91 enzyme-linked immunosorbent assay. Fractions with appropriate densities and positive for  
92 capsid proteins were assayed for their infectivity in RK13 cells by quantitative reverse  
93 transcription-PCR (QRT-PCR) measuring viral E1<sup>Λ</sup>E4 transcripts[6]. Those fractions capable of  
94 generating viral transcripts in inoculated cells were retested for their ability to be neutralized by  
95 type-specific monoclonal antibodies. Fractions (and particles) termed “infectious” both induced  
96 the production of E1<sup>Λ</sup>E4 transcripts in the in vitro infection assay and lost this ability in the  
97 presence of a specific MAb[6-8].

## 98 **Cutaneous challenge with QV (rabbits)**

99 To evaluate the infectivity of quasivirions in vivo, several sites of scarified rabbit  
100 skin were exposed to 5  $\mu$ L aliquots of stock preparations as previously described[9;10].  
101 Animals were monitored for 10 weeks after challenge. Papilloma volumes were charted  
102 as height x width x depth. Additionally back of each rabbit was individually photographed.

103 Prior to a transfer of pre-challenge serum into naïve donor animals, all donor animals  
104 were bled and small samples stored as pre-bleed samples and the remainder used as diluents  
105 for the pre-challenge sera derived during the active immunization phase. For that purpose, a  
106 minimum of ten naïve New Zealand White rabbits per pre-challenge serum group were bled by  
107 ear vein to obtain 40 mL of blood yielding 15-20 mL of naïve serum per rabbit. Pre-challenge  
108 serum from each of the active immunization groups was taken at 1 month after the last antigen  
109 dose and pooled. Each pool of serum was mixed with naïve serum to generate a five-fold  
110 dilution series composed of 30 mL each of the following: naïve serum (negative control), 1/2,  
111 1/10, 1/50, 1/250 and 1/1250. The 30 mL of diluted serums were stored at -80°C for up to 2  
112 weeks prior to the start of the study. Three days prior to challenge, rabbits were anesthetized  
113 with a mixture of Ketamine HCl (40 mg/kg) and xylazine (5 mg/kg) and their backs shaved. Up  
114 to twenty four evenly spaced 1 cm x 2 cm areas were scarified by scalpel along the back of  
115 each rabbit. On the day of challenge, pre-challenge pooled dilutions were administered to pairs  
116 of rabbits at 1 ml per minute by ear vein for a total of a 15 ml volume. Final dilution in-vivo of  
117 the pre-challenge pools were estimated as 0 (naïve serum only), 1/20, 1/100, 1/500, 1/2500 and  
118 1/12,500. Six hours after intra-venous serum administration, rabbits were challenged with HPV  
119 quazivirus types 6, 16, 18, 31, 45, 58 and CRPV as described previously(50). Briefly, animals  
120 were anesthetized with a mixture of Ketamine HCl (40 mg/kg) and xylazine (5 mg/kg), a small  
121 pre-challenge serum sample was taken and the 1 cm x 2 cm patches were abraded by scalpel.  
122 Each pair of rabbits was challenged with an administration of 5  $\mu$ L of QV stocks per  
123 pair/triplicate of scarified sites on the back. Each 5  $\mu$ L volume was scraped into the site with a

124 26 g needle and syringe. Weekly caliper measurements of papilloma “wart” volume and digital  
125 photos of individual animals were recorded during post-challenge weeks 3 to 10.

126 **Sup. Fig. 1 Purification and biological (TLR5 signaling) properties of**  
127 **Fla-L2 vaccines**

128 **Sup. Fig. 1 A, B, C** - purified protein samples of Fla~1X11-200, Fla~5X11-88,  
129 Fla~8X11-88 respectively. Lanes 1 and 2 are SDS PAGE; lanes 3 and 4 – Western  
130 Blots. Western blot of Fla~1X11-200 (Fig. 2-A) membrane has been performed with  
131 mAb RG1 specific to AA17-36 of HPV16 L2, while Western blot with Fla~5X11-88 (Fig.  
132 2-B) and Fla~8X11-88 (Fig. 2-C) membranes have been processed with anti-His mAbs.

133 **Sup. Fig. 1-D. Induction of TLR-5 by Fla-L2 vaccines.**

134 TLR5 stimulation has been tested by assessing NF- $\kappa$ B activation in HEK293 cells expressing a  
135 human TLR5 and containing secreted alkaline phosphatase (SEAP) reporter gene under the  
136 control of an NF- $\kappa$ B promoter. TLR5 signaling was quantified by measurement of SEAP activity  
137 in the supernatants of stimulated cells. Each protein was applied to HEK293-hTLR5 cells at the  
138 four concentrations indicated and compared to control sample Fla~ (delta D3 flagellin  
139 backbone). Expression of NF- $\kappa$ B induced SEAP has been detected at OD at 650nm after 16-20  
140 hr of incubation.

141 **For that purpose** HEK293 cells stably transfected with pUNO-hTLR5 (Invivogen, CA) to  
142 express human TLR5 (hTLR-5) gene are used to bind the target agonist (flagellin). Upon  
143 binding to its receptor flagellin initiates a signaling cascade that eventually leads to a  
144 translocation of transcription factor NF- $\kappa$ B which induces transcription of the reporter gene  
145 pNiFty-SEAP (Invivogen, CA) coding for secreting soluble embryonic alkaline phosphatase  
146 (SEAP) controlled by NF- $\kappa$ B–dependent promoter. SEAP catalysed hydrolysis of p-Nitrohenyl

147 phosphate producing a colorimetric change in culture media or to added reagents which is  
148 detectable in the range of OD=405-650 nm.  
149 Detection procedure briefly contains the following steps: (1) 96-well plate (200µL total volume)  
150 containing (25,000-50,000 cells/well) of HEK293pNiFty-SEAP and 20µL of sample or the  
151 positive control ligands were added to the plate; (2) each Fla~, Fla~fusion or control was  
152 assayed in the concentration range of 100 ng/ml, 10 ng/ml, 1 ng/ml and 0.1 ng/ml. Each sample  
153 was titrated two fold in triplicate and added to the wells. (3) after a 16-20 hr incubation the  
154 supernatant was removed in a 96 well format and the plate is centrifuged to pellet cell debris;  
155 (4) 10 µl of the clarified culture supernatant was transferred to a clean 96 well tray and heated at  
156 65°C for 5-10 minutes to inhibit endogenous alkaline phosphatase activity; (5) 50 µl of a 1X  
157 Dilution Buffer (Proprietary, Invivogen, Inc) 100 µl of 1X Assay Buffer\*, 20 µl of 100mM L-  
158 Homoarginine and 20 µl of water was added to each well; (6) the plate was incubated at 37°C  
159 for 10 minutes and 20 µl of Staining Solution (Proprietary, Invivogen, Inc) was added; (7) plate  
160 was incubated for an additional 10 minutes at 37°C in the dark and then the OD was read at  
161 405nm to 650nm.

162

### 163 ***Preparation of vaccine antigens:***

164 To purify HPV L2 flagellin fusion constructs we developed an original purification  
165 method based on the selectivity of HiTrap Q HP resin (GE Healthcare Life Sciences,  
166 Pittsburgh, PA) in binding/elution mode to capture protein from the soluble fraction. The  
167 method was used for all constructs with slight modifications for Fla~5x11-88 and  
168 Fla~8x11-88 to overcome nonspecific interaction of the target protein with the  
169 chromatography matrix.

170 For purification of the Fla~ only and Fla~1x11-200 immunogens, cells were harvested  
171 by centrifugation and cell paste was stored at -80° C. Cell paste was thawed and

172 diluted to 10% solids in 50 mM Tris-HCl, 150 mM NaCl, pH 8.0 with Complete EDTA-  
173 free protease inhibitors cocktail tablets (Roche Applied Science, Indianapolis, IN). To  
174 disrupt cells, the cell suspension was passed twice through a microfluidizer  
175 (Microfluidics, Newton, MA, model 110Y) at 18,000 psi, and cooled to 4-8 °C. The  
176 resultant lysate was clarified by centrifugation on Beckman Avanti J-25 centrifuge  
177 (Beckman Coulter, Inc., Indianapolis IN) with JA-25.50 rotor at 29,000 X g for 40-60 min  
178 at 4° to 8°C. The target protein was precipitated with 30% ammonium sulfate by adding  
179 a 3 M stock solution dropwise into clarified cell lysate on a stir plate and continually  
180 stirring for 90–120 min at 4°C. Precipitated protein was collected by centrifugation at  
181 29,000 X g for 40-60 min at 4° to 8°C; the pellet was resuspended in the same volume  
182 of 50 mM Tris-HCl, pH 8.0 with Complete EDTA-free protein inhibitors. The  
183 resuspended material was clarified by centrifugation at 29,000 X g for 40 min at 4° to  
184 8°C and the soluble fraction was applied to two 5 ml HiTrap Q HP pre-packed columns  
185 attached together for a total column volume of 10 ml pre-equilibrated with 50 mM Tris-  
186 HCl, pH 8.0. At bigger scales we utilized HiTrap FF media in XK 50/30 housings (both  
187 from GE Healthcare Life Sciences, Pittsburgh, PA) with column volumes of 150 -180 ml.  
188 Bound protein was eluted with a linear salt gradient from 0 to 1.0 M NaCl in 50 mM Tris-  
189 HCl, pH 8.0. For final polishing, peak elution fractions were pooled, spiked with 3 M  
190 Ammonium Sulfate to 1 M, filtered through a 0.45 µm Acrodisc syringe filters with  
191 hydrophilic polyethersulfone Supor membrane (Pall, Inc, Port Washington, NY) and  
192 loaded onto a HiTrap Phenyl HP 5 ml pre-packed column (GE Healthcare Life Sciences,  
193 Pittsburgh, PA) pre-equilibrated with 50 mM Sodium Phosphate, 1 M Ammonium  
194 Sulfate, pH 8.0. Bound protein was eluted with a linear gradient from 1.0 M to 0



195 Ammonium Sulfate in 50 mM Sodium Phosphate, pH 8.0. Peak fractions were pooled,  
196 dialyzed against Phosphate Buffered Saline (PBS buffer) solution, 5 mM EDTA, pH 8.0,  
197 followed by sterile filtration through a 0.2 µm Acrodisc syringe filters with Supor  
198 membrane (Pall, Inc, Port Washington, NY) and storage at -80 °C.

199 For purification of Fla~5x11-88 and Fla~8x11-88 immunogens, the purification  
200 procedure described above was modified as described below: (1) post-Ammonium  
201 sulfate precipitation, pellets containing target protein were resuspended in 50 mM Tris-  
202 HCl, 8 M urea, pH 8.6 buffer and clarified from insoluble material by centrifugation at  
203 29,000 X g for 40 min at 4 to 8 °C. The soluble fraction was applied to a 5 ml HiTrap Q  
204 HP pre-packed column or to 180 ml of HiTrap FF resin packed in an XK 50/30 housings  
205 pre-equilibrated with the same buffer containing 8 M urea at pH 8.6. Bound protein was  
206 eluted with the same salt gradient as before, under denaturing conditions; (2) Similarly,  
207 8 M urea was added to the HiTrap Phenyl HP resin binding (50 mM Tris-HCl, 1 M  
208 Ammonium Sulfate) and elution (50 mM Tris-HCl) buffers at pH 8.6; (3) Peak elution  
209 fractions containing target protein were refolded by extensive dialysis against 50 mM  
210 Tris-HCl, 150 mM NaCl, 5 mM EDTA, pH 8.0, followed by sterile filtration and storage  
211 at -80°C.

212 Protein purity and integrity were visualized by NuPAGE Novex 4-12% Bis-Tris 1.0 mm  
213 Gels in MES SDS Running buffer at 200 V constant voltage and stained with  
214 SimplyBlue SafeStain (all from Life Technologies, Carlsbad, CA). Protein concentrations  
215 were determined using the Pierce BCA Protein Assay kit (Thermo Fisher Scientific  
216 Inc., Waltham, MA) according to their standard protocol with sample incubation at 37 °C

217 for 30 minutes, BSA standards and read at 562 nm absorbance on a SpectraMax M5  
218 spectrophotometer (Molecular Devices, LLC, Sunnyvale, CA).

219

220

## 221 **Sup. Fig. 2 Diagram of preclinical study design**

222 Mouse and rabbit experimental designs are shown on the upper and lower parts of  
223 diagram respectively. Either 25 or 125 µg of vaccines were administered three times to  
224 mice or rabbits respectively. Mice were immunized biweekly, while rabbits in three week  
225 intervals. Both species were bled before challenges which happened after either 2 or 24  
226 weeks (mice; vaginal challenge) or 3 weeks (rabbits; cutaneous challenge) with types  
227 specified on the diagram. A passive immunization study was also performed in rabbits  
228 to elucidate the role of antibodies in protection. For this purpose pooled rabbit serum  
229 samples harvested a day 77 were serially diluted and transferred into naive animals. 6  
230 hours later animals were challenged with HPV6, 16, 18, 31, 45 and 58 quasivirions and  
231 CRPV.

232

## 233 **Sup. Fig. 3 Example of End Point Protection Titer determination**

### 234 **(EPPT)**

235 This figure illustrates the EPPT concept exemplified by the efficacy of anti-Fla~5x11-88  
236 sera passively administered into naïve rabbits and challenged with quasivirus (QV) 45

237 **Panel A** - Efficacy graph: individual anti-Fla~5X11-88 sera dilutions (X axes) versus  
238 wart volumes (Y axes; mm<sup>3</sup>; Geometric means are shown) at week 8 after the challenge

239 with QV45. EPPT is determined by the highest sera dilution achieving complete  
240 protection is indicated by a block arrow (dilution 100; see Material and Methods).

241 **Panel B** – Representative images of rabbits passively transferred with anti-Fla~5X11-88  
242 sera at dilutions of 100, 500 or 2,500 and challenged with QV45 and maintained 8  
243 weeks post challenge. Black arrows show tattoo dots corresponding to QV45 challenge  
244 locations. Note that two challenge spots were located on either side of each of QV-  
245 specific tattoo dots. 6 viruses have been used for challenge of each rabbit (tattoo dots  
246 from the top to the bottom): QV6, 16, 18, 31, 45, 58 and CRPV. The location of QV45  
247 challenge is also highlighted by dashed frame. As on panel A, block arrow signify a  
248 rabbit corresponding to EPPT=100.

249  
250 **Sup. Fig. 4-6 Protective efficacy of Fla~1X11-200 (A-panels), Fla~5X11-**  
251 **88 (B-panels), Cervarix<sup>®</sup>(C-panels), Gardasil<sup>™</sup> (D-panels); Placebo (E-**  
252 **panels) against challenges with quazivirus types 6, 16, 18, 31, 45, 58**  
253 **and CRPV as detected at 1 (Supp.Fig. 4), 6 (Supp.Fig. 5) and 12**  
254 **(Supp. Fig. 6) months postimmunizations respectively.**

255 Geometric means of wart volumes are shown on Y axes on the graph; Antigens are  
256 listed on X axis. Representative photographs of rabbit backs within each panel are  
257 provided for illustration purposes

258

259

260

261

262

263

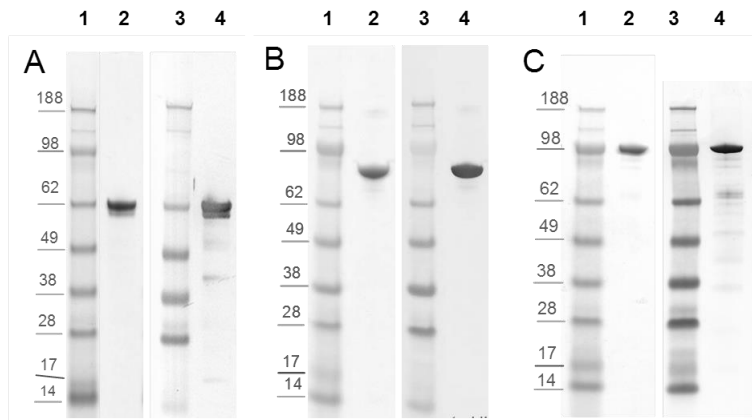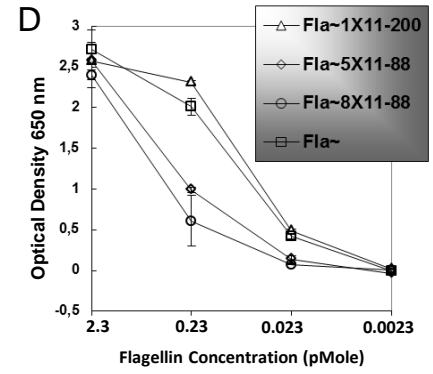

264

# Sup. Fig 1

265

266

267

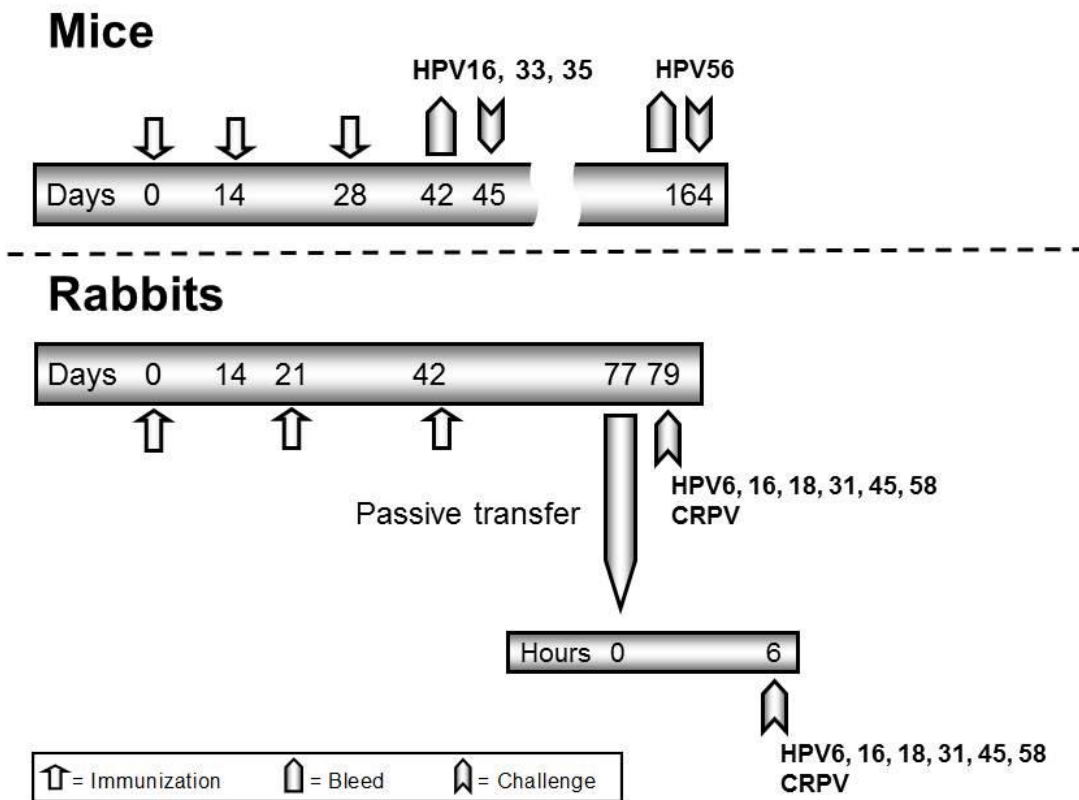

270 **Sup. Fig. 2**

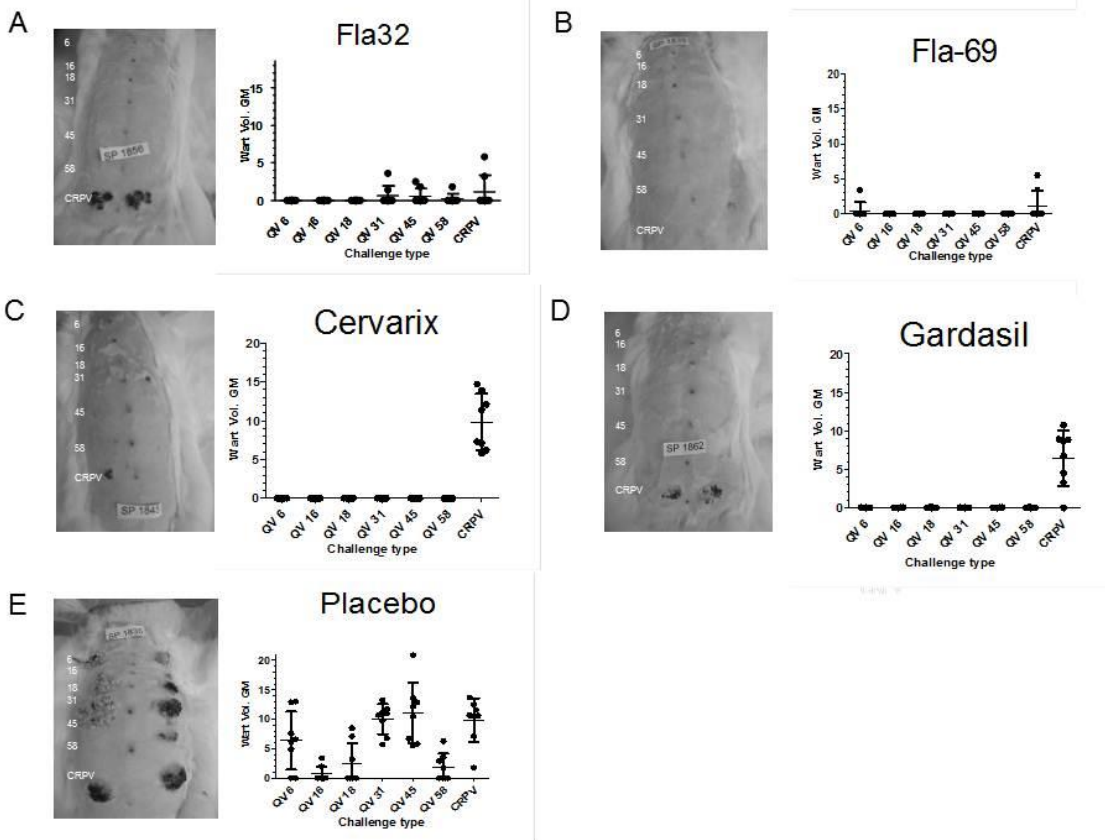

275 **Sup. Fig. 3**

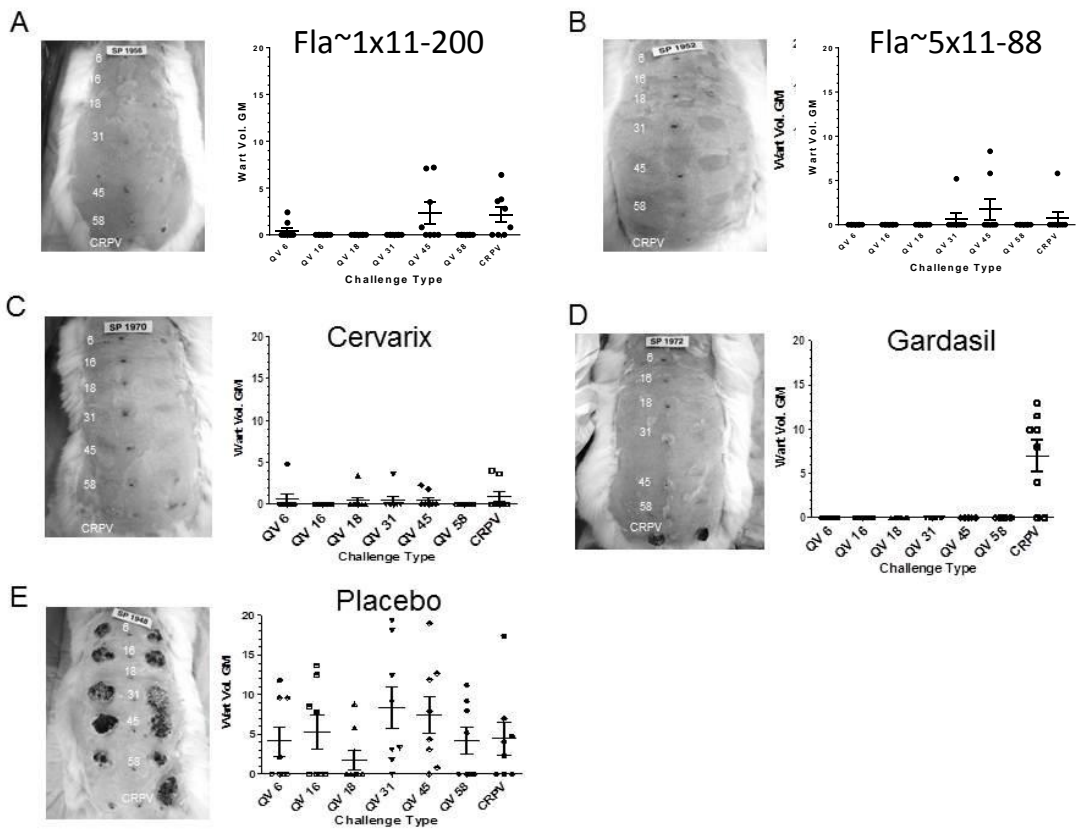

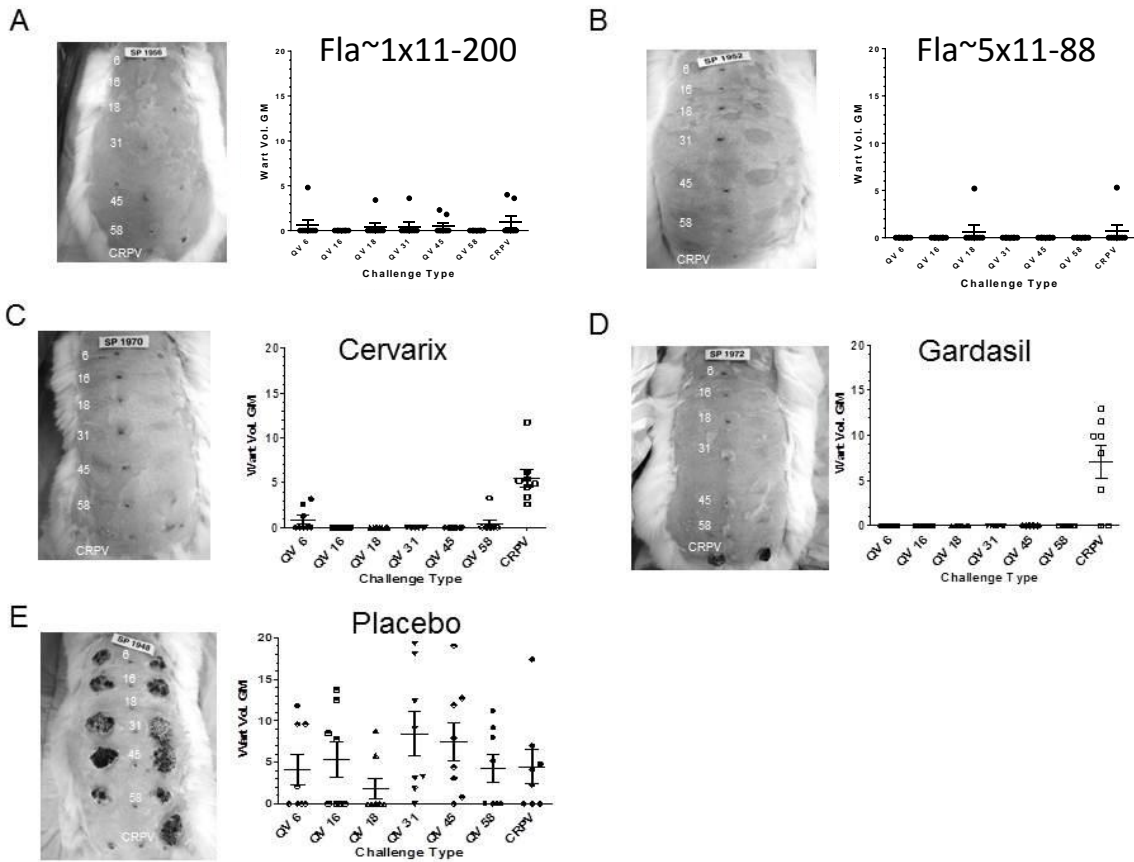

283 **Sup. Fig. 5**



285

## Passive transfer of anti-Fla~5x11-88 sera/challenge with QV45

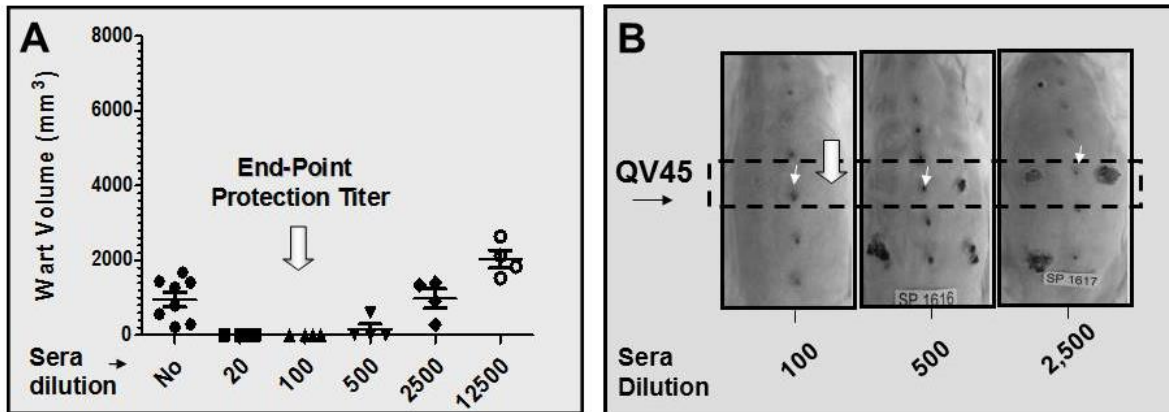

286

287

## 288 Sup. Fig 6

289

290

291

292

293

### Reference List

294

295 [1] Buck CB, Pastrana DV, Lowy DR, Schiller JT. Generation of HPV pseudovirions using transfection  
296 and their use in neutralization assays. Davy C, Doorbar J, editors. [119], 445-461. 2004.

297 Totowa,NJ. Methods in Molecular Medicine.

298 Ref Type: Serial (Book,Monograph)

299 [2] Jagu S, Kwak K, Schiller JT, et al. Phylogenetic considerations in designing a broadly protective  
300 multimeric L2 vaccine. J Virol 2013;87(11):6127-36.

301 [3] Liu G, Tarbet B, Song L, et al. Immunogenicity and efficacy of flagellin-fused vaccine candidates  
302 targeting 2009 pandemic H1N1 influenza in mice. PLoS One 2011;6(6):e20928.

303 [4] Mejia AF, Culp TD, Cladel NM, et al. Preclinical model to test human papillomavirus virus (HPV)  
304 capsid vaccines in vivo using infectious HPV/cottontail rabbit papillomavirus chimeric  
305 papillomavirus particles. J Virol 2006;80(24):12393-7.

- 306 [5] Christensen ND. Emerging human papillomavirus vaccines. *Expert Opin Emerg Drugs*  
307 2005;10(1):5-19.
- 308 [6] Culp TD, Christensen ND. Kinetics of in vitro adsorption and entry of papillomavirus virions.  
309 *Virology* 2004;319(1):152-61.
- 310 [7] Christensen ND, Kreider JW. Neutralization of CRPV infectivity by monoclonal antibodies that  
311 identify conformational epitopes on intact virions. *Virus Res* 1991;21(3):169-79.
- 312 [8] Culp TD, Cladel NM, Balogh KK, Budgeon LR, Mejia AF, Christensen ND. Papillomavirus particles  
313 assembled in 293TT cells are infectious in vivo. *J Virol* 2006;80(22):11381-4.
- 314 [9] Gambhira R, Karanam B, Jagu S, et al. A protective and broadly cross-neutralizing epitope of  
315 human papillomavirus L2. *J Virol* 2007;81(24):13927-31.
- 316 [10] Gambhira R, Jagu S, Karanam B, et al. Protection of rabbits against challenge with rabbit  
317 papillomaviruses by immunization with the N terminus of human papillomavirus type 16 minor  
318 capsid antigen L2. *J Virol* 2007;81(21):11585-92.  
319  
320
